# Supplementary material for: Phytophthora heterospora sp. nov., a New Pseudoconidia-Producing Sister Species of P. palmivora
Source: MDPI journal article supplement (doi:10.3390/jof7100870), 2021-10-16
Supplement: s1 [file s1]

**Table S2.** Base pairs (bp) differences across *Btub*, ITS, *cox1*, *nadh1* sequences showing inter- and intraspecific variation of *Phytophthora heterospora* (HET), *P. palmivora* (PAL) and *P. taxon palmivora*-like (LIK).

|              | Length of alignment (bp) | Differences PAL/HET (bp) | Differences PAL/LIK (bp) | Differences HET/LIK (bp) | Differences within PAL (bp) | Differences within HET (bp) |
|--------------|--------------------------|--------------------------|--------------------------|--------------------------|-----------------------------|-----------------------------|
| <i>Btub</i>  | 918                      | 11-16                    | 6-14                     | 7-9                      | 0-16                        | 0-2                         |
| ITS          | 788                      | 3-4                      | 0-1                      | 3                        | 0-1                         | 0                           |
| <i>cox1</i>  | 1346                     | 1-2                      | 2                        | 0                        | 0-2                         | 0                           |
| <i>nadh1</i> | 796                      | 6                        | 0-6                      | 0                        | 0-6                         | 0                           |
| <b>Total</b> | 3848                     | 21-28                    | 8-21                     | 10-19                    | 0-25                        | 0-2                         |
