# Supplementary material for: Phytophthora heterospora sp. nov., a New Pseudoconidia-Producing Sister Species of P. palmivora
Source: MDPI journal article supplement (doi:10.3390/jof7100870), 2021-10-16
Supplement: s1 [file s1]

**Table S1.** Information of all oomycete isolates used in the phylogenetic analyses, including local, international and alternative isolate identifications. GenBank accession numbers for sequences obtained in the present study are printed in bold.

| (Sub)<br>Clade | Species                                 | Isolate identification                                                  | GenBank accession No.   |                         |                                |                         |
|----------------|-----------------------------------------|-------------------------------------------------------------------------|-------------------------|-------------------------|--------------------------------|-------------------------|
|                |                                         |                                                                         | ITS                     | <i>Btub</i>             | <i>cox1</i>                    | <i>nadh1</i>            |
| -              | <i>Nothophytophthora valdiviana</i> (T) | CBS 142357; CL331                                                       | MZ753910                | MZ736449                | MZ736421                       | KY788628                |
| 1              | <i>Phytophthora nicotianae</i> (ASI2)   | WPC P6303; CPHST BL 162                                                 | (GS)<br>JAAKBE010001860 | (GS)<br>JAAKBE010003943 | (GS)<br>JAAKBE010002284        | (GS)<br>JAAKBE010003823 |
| 1a             | <i>P. cactorum</i>                      | P295                                                                    | (GS)<br>RCMO01001417    | (GS)<br>RCMO01000030    | (GS)<br>RCMO01000985           | (GS)<br>RCMO01000778    |
| 1c             | <i>P. infestans</i>                     | CBS 147289, T30-4; TJ1504                                               | MZ753914                | MZ736454                | MZ736428                       | <b>MZ736507</b>         |
| 2a             | <i>P. meadii</i>                        | CBS 219.88; 61J9; IMI 129185; WPC P3950 - P3433; ATCC 58103             | MH620109                | KX250594                | Contig<br>HQ708324<br>MT583652 | MT583705                |
| 2b             | <i>P. tropicalis</i> (T)                | CBS 434.91; WPC P10329; 35C8; ATCC 76651, MYA-4218; CPHST BL 58         | MH620112                | KX250699                | Contig<br>MH620025<br>MH136987 | -                       |
| 2b             | <i>P. tropicalis</i>                    | AN97/86; PD97/11132                                                     | -                       | -                       | -                              | AY563988                |
| 2c             | <i>P. multivora</i> (T)                 | CBS 124094; 55C5; WPC P16837, P19594; WAC13201; ICMP 19454              | MG865546                | KX250776                | Contig<br>MH136939<br>FJ237508 | <b>MZ736508</b>         |
| 2e             | <i>P. multivesiculata</i> (T)           | CBS 545.96; 29E3; WPC P10410; CPHST BL 50G; MG 33-6; AR 239; PD 95/8679 | MH620118                | EU080066                | Contig<br>MH136937<br>MH620032 | KX011295                |
| 3              | <i>P. nemorosa</i> (T)                  | CBS 114870; WPC P19600; 41C4; CPHST BL 27; ATCC MYA-2948                | KF317082                | KX250965                | Contig<br>KF317104<br>MH136941 | DQ361211                |
| 3              | <i>P. pseudosyringae</i> (T)            | CBS 111772; WPC P10437; 30A8; CPHST BL 51G; ATCC MYA-4222; p284; PSEU 6 | KF317083                | KX250979                | <b>MZ736504</b>                | <b>MZ736509</b>         |
| 4              | <i>P. alticola</i>                      | CBS 121939; WPC P16948 - P16052; CMW 34279 - 19425; 47G5                | KF317084                | KX251007                | Contig<br>HQ261245<br>KF317106 | -                       |
| 4              | <i>P. arenaria</i> (T)                  | CBS 127950; WPC P19599; PD 825; 55C2; CPHST BL 78                       | HQ013219                | KJ372289                | Contig<br>MH136848<br>MH620034 | -                       |

| (Sub)<br>Clade | Species                         | Isolate identification                                              | GenBank accession No. |                      |                                |                      |
|----------------|---------------------------------|---------------------------------------------------------------------|-----------------------|----------------------|--------------------------------|----------------------|
|                |                                 |                                                                     | ITS                   | <i>Btub</i>          | <i>cox1</i>                    | <i>nadh1</i>         |
| 4              | <i>P. boodjera</i> (T)          | CBS 138637; VHS 26806; CPHST BL 181;<br>WPC 13637                   | KJ372244              | KJ372283             | Contig<br>KJ396688<br>MH477743 | -                    |
| 4              | <i>P. cathayensis</i> (T)       | CP30; CGMCC 19655                                                   | MN385741              | MT063102             | MN692211                       | -                    |
| 4              | <i>Phytophthora heterospora</i> | 317-A12; CBS 148036                                                 | MT232395              | MZ782810             | MZ782831                       | MZ782852             |
| 4              | <i>P. heterospora</i>           | A1A                                                                 | MT232399              | MZ782813             | MZ782834                       | MZ782855             |
| 4              | <i>P. heterospora</i>           | A1B1                                                                | MZ927098              | MZ782814             | MZ782835                       | MZ782856             |
| 4              | <i>P. heterospora</i>           | C2B1                                                                | MZ927099              | MZ782815             | MZ782836                       | MZ782857             |
| 4              | <i>P. heterospora</i>           | DB2                                                                 | MZ927100              | MZ782816             | MZ782837                       | MZ782858             |
| 4              | <i>P. heterospora</i>           | FK1                                                                 | KM979514              | KU870332             | KU870322                       | KP050547             |
| 4              | <i>P. heterospora</i>           | FK2                                                                 | KP050543              | KU870333             | KU870323                       | KP050548             |
| 4              | <i>P. heterospora</i>           | FK3                                                                 | KP050544              | KU870334             | KU870324                       | KP050549             |
| 4              | <i>P. heterospora</i>           | FK4                                                                 | KP050545              | KU870335             | KU870325                       | KP050550             |
| 4              | <i>P. heterospora</i>           | FK5                                                                 | KP050546              | KU870336             | KU870326                       | KP050551             |
| 4              | <i>P. heterospora</i>           | Campobello2b                                                        | MT232397              | MZ782812             | MZ782833                       | MZ782854             |
| 4              | <i>P. heterospora</i>           | Palm2                                                               | MT232396              | MZ782811             | MZ782832                       | MZ782853             |
| 4              | <i>P. heterospora</i>           | PH047                                                               | MZ927095              | MZ782804             | MZ782825                       | MZ782846             |
| 4              | <i>P. heterospora</i>           | PH051; TJ0237; CBS 148035                                           | MT232392              | MZ782805             | MZ782826                       | MZ782847             |
| 4              | <i>P. heterospora</i>           | PH052                                                               | MZ927096              | MZ782806             | MZ782827                       | MZ782848             |
| 4              | <i>P. heterospora</i> (T)       | PH054; TJ0238; CBS 148034                                           | MT232393              | MZ782807             | MZ782828                       | MZ782849             |
| 4              | <i>P. heterospora</i>           | PH057                                                               | MZ927097              | MZ782808             | MZ782829                       | MZ782850             |
| 4              | <i>P. heterospora</i>           | PH211                                                               | MT232394              | MZ782809             | MZ782830                       | MZ782851             |
| 4              | <i>P. litchii</i> (AS11)        | CBS 100.81; WPC P15218; CPHST BL 48G;<br>ATCC 34595; MG 33-3        | MG865525              | MH493966             | MH136920                       | DQ361208             |
| 4              | <i>P. litchii</i>               | SHS3                                                                | -                     | (GS)<br>PCFV01000014 | (GS)<br>PCFV01000263           | (GS)<br>PCFV01000263 |
| 4              | <i>P. megakarya</i> (T)(A1)     | IMI 182590; WPC 1664; CPHST BL 22                                   | MG865533              | -                    | Contig<br>MH136928<br>AY564193 | -                    |
| 4              | <i>P. megakarya</i>             | IMI 337098                                                          | -                     | AY564078             | -                              | AY564020             |
| 4              | <i>P. megakarya</i> (T)(A2)     | CBS 238.83; 61J5; WPC P1672; CPHST BL 73;<br>ATCC 42100; IMI 202077 | MG865534              | KX251035             | Contig<br>MH136929<br>MH620035 | -                    |

| (Sub)<br>Clade | Species                         | Isolate identification                                                                   | GenBank accession No.   |                         |                                |                      |
|----------------|---------------------------------|------------------------------------------------------------------------------------------|-------------------------|-------------------------|--------------------------------|----------------------|
|                |                                 |                                                                                          | ITS                     | <i>Btub</i>             | <i>cox1</i>                    | <i>nadh1</i>         |
| 4              | <i>P. megakarya</i>             | zdho                                                                                     | -                       | -                       | -                              | (GS)<br>NBNE01000504 |
| 4              | <i>P. palmivora</i>             | CBS 179.26; IMI 198927; WPC P3548                                                        | MT232400                | MZ782817                | MZ782838                       | MZ782859             |
| 4              | <i>P. palmivora</i>             | Phoenix4                                                                                 | MT232403                | MZ782819                | MZ782840                       | MZ782861             |
| 4              | <i>P. palmivora</i>             | PhoenixF                                                                                 | MT232402                | MZ782818                | MZ782839                       | MZ782860             |
| 4              | <i>P. palmivora</i>             | IMI 390579; GRE1                                                                         | MT232404                | MZ782820                | MZ782841                       | MZ782862             |
| 4              | <i>P. palmivora</i>             | IMI 503890; MD5                                                                          | MT232406                | MZ782821                | MZ782842                       | MZ782863             |
| 4              | <i>P. palmivora</i>             | IMI 503891; MD6                                                                          | MT232407                | MZ782822                | MZ782843                       | MZ782864             |
| 4              | <i>P. taxon palmivora</i> -like | PH083                                                                                    | MZ927101                | MZ782823                | MZ782844                       | MZ782865             |
| 4              | <i>P. taxon palmivora</i> -like | PH090                                                                                    | MT232401                | MZ782824                | MZ782845                       | MZ782866             |
| 4              | <i>P. palmivora</i> (ASI1)      | CBS 305.62; WPC P0633; CPHST BL 105; IMI 062655; IMI 348384                              | MG865559                | MH493992                | MH136949                       | -                    |
| 4              | <i>P. palmivora</i> (ASI2)      | WPC P0255; CPHST BL 46; ATCC 26200                                                       | MG865560                | MH493994                | MH136950                       | -                    |
| 4              | <i>P. palmivora</i>             | ZC01                                                                                     | (GS)<br>VOQZ01000473    | (GS)<br>VOQZ0100        | (GS)<br>VOQZ01000950           | (GS)<br>VOQZ01000945 |
| 4              | <i>P. quercetorum</i> (T)       | CBS 121119; WPC P15555; ATCC MYA-4086; CPHST-BL 52G; MD 9/2                              | MG865577                | EU080901                | Contig<br>MH136969<br>KX759520 | -                    |
| 5              | <i>P. castaneae</i>             | CBS 587.85; WPC 15598; 61J7; IMI 325914; ATCC 36818; ICMP 19450                          | MH620122                | KX251098                | (MGS)<br>MN883602              | (MGS)<br>MN883602    |
| 5              | <i>P. heveae</i> (T)            | CBS 296.29; WPC P3428; 22J1; ATCC 58815; ICMP 19451; KACC 44943; IMI 180616; CPHST BL 67 | MH620123                | KX251112                | (MGS)<br>MN883604              | (MGS)<br>MN883604    |
| 6a             | <i>P. humicola</i> (T)          | CBS 200.81; WPC P3826; 32F8; ATCC 52179, MYA-4080; IMI 302303; p198; CPHST BL 42G;       | KF112855                | KX251140                | Contig<br>KF112862<br>HQ708305 | MZ736506             |
| 6b             | <i>P. chlamydospora</i>         | P17-99                                                                                   | (GS)<br>JAABLK010000522 | (GS)<br>JAABLK010000021 | (MGS)<br>CM022726              | (MGS)<br>CM022726    |
| 7a1            | <i>P. tyrrhenica</i> (T)        | CBS 142301; PH154; TJ1153                                                                | KU899188                | KU899265                | MZ736441                       | KU899507             |
| 7a2            | <i>P. europaea</i> (T)          | CBS 109049; 62A2; WPC P10324; EUR 2; CPHST BL 37G                                        | MH620138                | KX251523                | Contig<br>KU681022<br>HQ261303 | KU899469             |
| 7b             | <i>P. sojae</i>                 | 28F9; P6497                                                                              | KC733444                | KX251770                | (MGS)<br>DQ832717              | (MGS)<br>DQ832717    |

| (Sub)<br>Clade | Species                    | Isolate identification                                                           | GenBank accession No. |                                |                                |                      |
|----------------|----------------------------|----------------------------------------------------------------------------------|-----------------------|--------------------------------|--------------------------------|----------------------|
|                |                            |                                                                                  | ITS                   | <i>Btub</i>                    | <i>cox1</i>                    | <i>nadh1</i>         |
| 7c             | <i>P. cinnamomi</i> (T)    | CBS 144.22; IMI 022938; 61J1; WPC P2110; ATCC 1407                               | KU899160              | KX251812                       | Contig<br>HQ708257<br>MH620070 | KU899475             |
| 8a             | <i>P. sansomeana</i>       | WPC P8051; 47H3; ATCC MYA-4455; CPHST BL 55                                      | MH620155              | KX251931                       | (MGS)<br>MH936679              | (MGS)<br>MH936679    |
| 8b             | <i>P. lactucae</i> (T)     | 61F4; BPIC 1985; P19872; CPHST BL 113                                            | MH620161              | KX252043                       | Contig<br>MH620085<br>KC478738 | KF882714             |
| 8c             | <i>P. ramorum</i> (T)      | CBS 101553; P1577; BBA9/95; Pr-164; CSL2266; WPC P10103; PR-05-012; CPHST BL 55G | MG865581              | (GS)<br>RYEP01000230           | (MGS)<br>EU427470              | (MGS)<br>EU427470    |
| 9a2            | <i>P. quininea</i> (T)     | CBS 407.48; 46C4; ATCC 46733; WPC P1089-P8488; CPHST BL 54G                      | MG865580              | AY564085                       | Contig<br>AY564200<br>HQ708386 | AY564027             |
| 9b1            | <i>P. captiosa</i> (T)     | CBS 119107; 46H7; CPHST BL 11; NZFS 310C; WPC P10719; ICMP 15576                 | DQ297402              | -                              | -                              | -                    |
| 9b2            | <i>P. captiosa</i>         | 46H8; NZFS 430; ICMP 17567                                                       | -                     | KX252555                       | (MGS)<br>MN883606              | (MGS)<br>MN883606    |
| 10             | <i>P. boehmeriae</i> (T)   | CBS 291.29; WPC P6950; IMI 180614; MG 42-6; 45F9; CPHST BL 32G; ATCC 60238       | HQ643149              | EU080162                       | Contig<br>HQ261251<br>KT183047 | DQ361200             |
| 10             | <i>P. kernoviae</i> (T)    | WPC P19827; IMI 393170; CPHST BL 91; PCPCC P1571                                 | (GS)<br>VKKV01000063  | (GS)<br>VKKV01000263           | (GS)<br>VKKV01000418           | (GS)<br>VKKV01000418 |
| 11             | <i>P. lilii</i> (T)        | CBS 135746; NBRC 32174; MAFF 237500; EL 8701; CPHST BL 123                       | MG865523              | Contig<br>MG493965<br>AB856782 | MH136918                       | -                    |
| 12             | <i>P. castanetorum</i> (T) | CBS 142299; BD292                                                                | MF036182              | MZ736453                       | MZ736427                       | MF036292             |
| 12             | <i>P. quercina</i>         | TJ292; PL7; P731                                                                 | MF036194              | <b>MZ736504</b>                | <b>MZ736505</b>                | MF036301             |
| 12             | <i>P. tubulina</i> (T)     | CBS 141212; TJ271; TUB1; Hohenegg II/1; P736                                     | MF036196              | MZ736467                       | MZ736440                       | MF036303             |
| 14             | <i>P. cyperi</i>           | 11048                                                                            | MK045313              | -                              | -                              | -                    |
| 14             | <i>P. cyperi</i>           | MVAP06098582                                                                     | -                     | KY608800                       | MH445454                       | .                    |
| DMPH           | <i>Bremia lactucae</i>     | SF5                                                                              | (GS)<br>SHOA01000013  | (GS)<br>SHOA01000026           | (MGS)<br>MH271689              | (MGS)<br>MH271689    |

| (Sub)<br>Clade | Species                               | Isolate identification | GenBank accession No. |                      |                                      |                      |
|----------------|---------------------------------------|------------------------|-----------------------|----------------------|--------------------------------------|----------------------|
|                |                                       |                        | ITS                   | <i>Btub</i>          | <i>cox1</i>                          | <i>nadh1</i>         |
| DMPH           | <i>Plasmopara halstedii</i>           | Plhal710               | (GS)<br>PDFJ01000023  | (GS)<br>PDFJ01000039 | (GS)<br>PDFJ01000150                 | (GS)<br>PDFJ01000150 |
| DMPH           | <i>Plasmopara viticola</i>            | INRA-PV221             | (GS)<br>MBPM02000295  | (GS)<br>MBPM02000031 | (MGS)<br>MN105125                    | (MGS)<br>MN105125    |
| DMCC           | <i>Peronospora effusa</i>             | SPp3                   | MG793197              | -                    | -                                    | -                    |
| DMCC           | <i>Peronospora effusa</i>             | R14                    | -                     | (GS)<br>QLLG01000479 | (MGS)<br>MH325167                    | (MGS)<br>MH325167    |
| DMCC           | <i>Peronospora tabacina</i>           | 968-S26                | (GS)<br>NBSG01000065  | (GS)<br>NBSG01000797 | (MGS)<br>KT893456                    | (MGS)<br>KT893456    |
| DMCC           | <i>Pseudoperonospora cubensis</i>     | MSU-1                  | (GS)<br>AHJF01002487  | (GS)<br>AHJF01000065 | (GS)<br>AHJF01005719<br>AHJF01021320 | (GS)<br>AHJF01000547 |
| GDM            | <i>Sclerospora graminicola</i>        | UoM-SG                 | (GS)<br>MIQA02020524  | (GS)<br>MIQA02005411 | (GS)<br>MIQA02016028                 | (GS)<br>MIQA02022157 |
| BDM            | <i>Hyaloperonospora arabidopsidis</i> | Cala2                  | (GS)<br>LKIA01008204  | (GS)<br>LKIA01000455 | (GS)<br>LKIA01003057                 | (GS)<br>LKIA01001610 |
| BDM            | <i>Hyaloperonospora brassicae</i>     | HV2163                 | EU049248              | (GS)<br>SZZJ01000824 | (GS)<br>SZZJ01002632                 | -                    |

(T) Type;

(DMPH) Downy Mildews with Pyriform Haustoria;

(GDM) grass-infecting Graminicolous Downy Mildews;

(GS) Genome Sequence;

(DMCC) Downy Mildews with Colored Conidia;

(BDM) Brassicolous Downy Mildews;

(MGS) Mitochondrial Genome Sequence;

(ASI) Abad Selected isolate (from IDphy: molecular and morphological identification of *Phytophthora* based on the types, <https://idtools.org>).
